# Supplementary material for: A new method for centrifugal separation of blood components: Creating a rigid barrier between density-stratified layers using a UV-curable thixotropic gel
Source: Royal Society of Chemistry journal article supplement (doi:10.1039/c2jm14818h), 2011-12-23
Supplement: c2jm14818h.pdf [file c2jm14818h.pdf]

**Supporting Information for:**

**A novel method for centrifugal separation of blood components: Creating a rigid barrier between density-stratified layers using a UV-curable thixotropic gel**

Kunshan Sun, Hyuntaek Oh, Jane F. Emerson and Srinivasa R. Raghavan

---

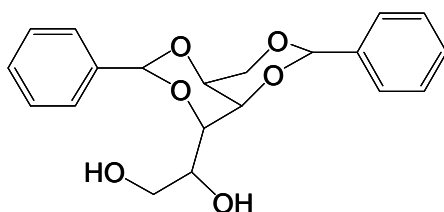

**(a) Organogelator:**  
1,3:2,4-di-O-benzylidene-D-sorbitol (DBS)

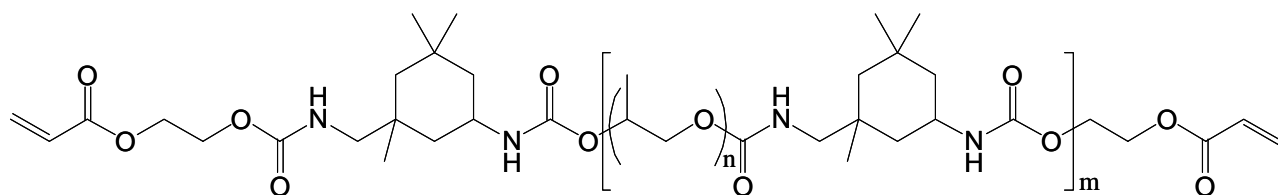

**(b) Oligomer:**  
Aliphatic polyurethane diacrylate (EBECRYL 230)

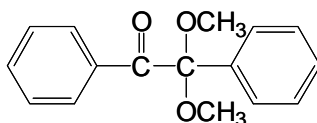

**(c) Initiator:**  
2,2-dimethoxy-1,2-diphenylethan-1-one (Additol BDK)

**Scheme S1.** Structures of the organogelator, UV-crosslinkable oligomer, and UV initiator used in our study.

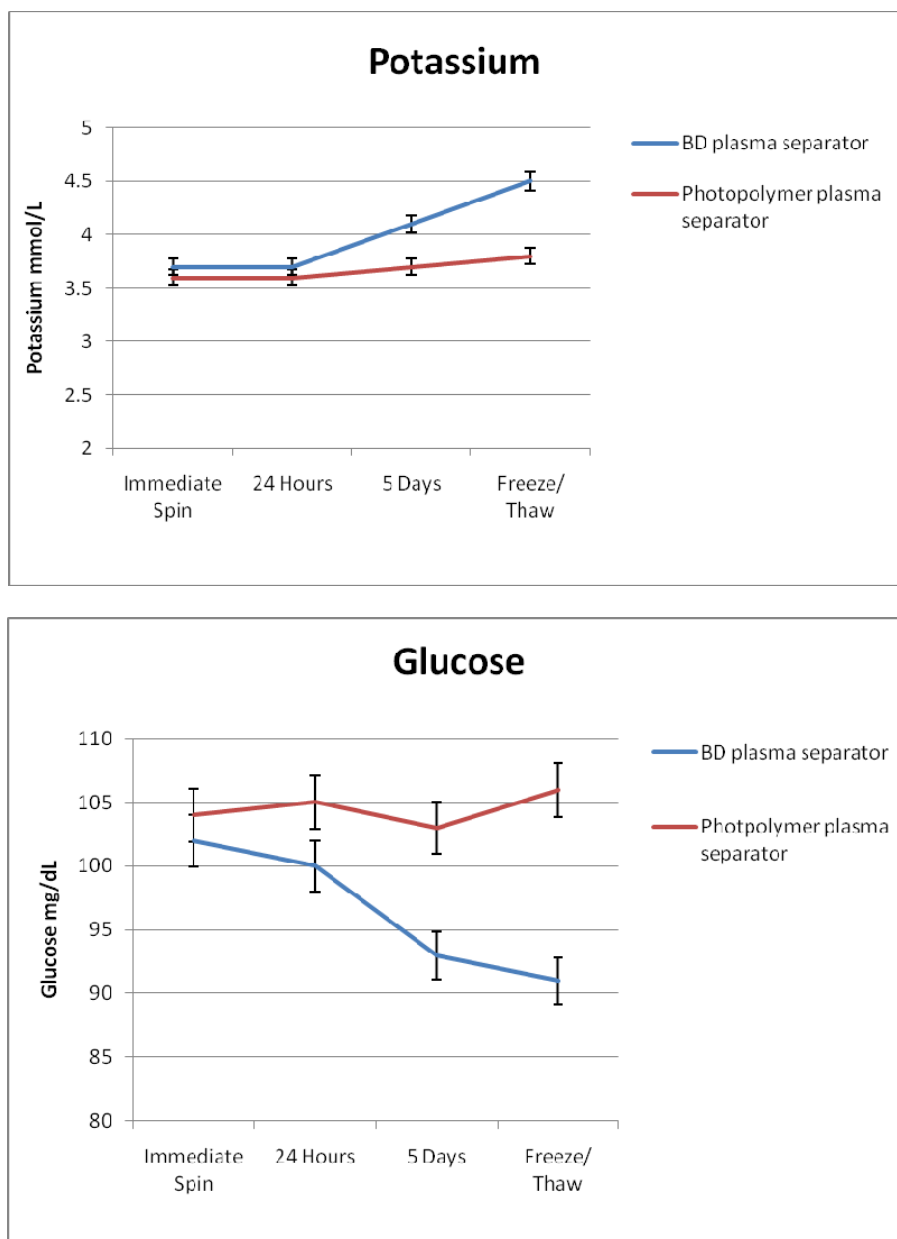

**Figure S1.** Comparison of analyte stability after storage and with a freeze thaw cycle. Immediate spin represents the value obtained with the primary tubes loaded onto the analyzers immediately after centrifugation. The primary tubes were then stored at 4°C and re-assayed at 24 hours and 5 days.

| Measured Analyte                 | Serum Separator<br>Tubes |     | Photopolymer<br>Separator Tubes |     |
|----------------------------------|--------------------------|-----|---------------------------------|-----|
| sodium (mmol/L)                  | 141                      | 141 | 141                             | 141 |
| potassium mmol/L                 | 4.4                      | 4.4 | 4.4                             | 4.3 |
| chlorides (mmol/L)               | 107                      | 106 | 105                             | 107 |
| CO2 (mmol/L)                     | 27                       | 27  | 26                              | 26  |
| glucose (mg/dL)                  | 96                       | 95  | 97                              | 97  |
| urea nitrogen (mg/dL)            | 12                       | 12  | 13                              | 12  |
| creatinine (mg/dL)               | 0.8                      | 0.9 | 0.8                             | 0.9 |
| calcium (mg/dL)                  | 9.4                      | 9.4 | 9.2                             | 9.4 |
| total protein (g/dL)             | 7                        | 6.9 | 7                               | 6.9 |
| albumin (g/dL)                   | 3.6                      | 3.6 | 3.7                             | 3.7 |
| alkaline phosphatase (U/L)       | 124                      | 123 | 124                             | 124 |
| aspartate aminotransferase (U/L) | 34                       | 36  | 35                              | 34  |
| alanine aminotransferase (U/L)   | 43                       | 41  | 43                              | 42  |
| total bilirubin (mg/dL)          | 0.5                      | 0.3 | 0.5                             | 0.4 |

**Table S1.** Comprehensive metabolic panel measurements obtained in duplicate in BD serum separator tubes and photopolymer separator tubes from the same subject.
